# Supplementary material
Source: PubMed Central journal article supplement (PMC3703969)
Supplement: 1220512110_pnas.201220512SI.pdf [file 1220512110_pnas.201220512SI.pdf]

# Supporting Information

Sander et al. 10.1073/pnas.1220512110

## Relationship Between Raclopride and Dopamine Occupancies

Raclopride (RAC) competes with dopamine (DA) for binding to D2/D3 dopamine receptors (D2/D3R), such that increasing doses of RAC displace progressively more DA. To establish an approximate relationship between these occupancies, we assume transient equilibrium conditions, which are applicable at the peak response of RAC occupancy. Moreover, we assume that the nondisplaceable tissue-free fraction of [<sup>11</sup>C]RAC stays constant. Because the onset rate constant is a function of the available receptor pool ( $k_3 = k_{\text{on}}B_{\text{max}}$ ), the equilibrium condition can be written as (1)

$$(B_{\text{max}} - B_{\text{DA}} - B_{\text{RAC}})F_{\text{DA}} = K_{\text{D,DA}}B_{\text{DA}},$$

where

$$K_{\text{D,DA}} = \frac{k_{\text{off,DA}}}{k_{\text{on,DA}}},$$

or

$$\theta_{\text{DA}} = (1 - \theta_{\text{RAC}}) \frac{F_{\text{DA}}}{F_{\text{DA}} + K_{\text{D,DA}}}, \quad [\text{S1}]$$

with

$$\theta_{\text{DA}} = \frac{B_{\text{DA}}}{B_{\text{max}}} \quad \text{and} \quad \theta_{\text{RAC}} = \frac{B_{\text{RAC}}}{B_{\text{max}}}.$$

$B_{\text{max}}$ ,  $B_{\text{DA}}$ , and  $B_{\text{RAC}}$  refer to the total number of D2R receptors bound by DA and receptors bound by RAC, respectively.  $F_{\text{DA}}$  is the free DA concentration,  $K_{\text{D,DA}}$  is the dissociation constant for DA at D2R, and fractional occupancies are denoted by  $\theta_{\text{DA}}$  and  $\theta_{\text{RAC}}$ . A solution for the free DA concentration should account both for displacement of bound DA into the free pool and for release of additional DA due to RAC binding presynaptic D2 autoreceptors. We assume the latter process occurs in proportion to RAC occupancy:

$$\begin{aligned} F_{\text{DA}} &= F_{\text{DA}}^{(0)} + B_{\text{DA}}^{(0)} - B_{\text{DA}} + \delta\theta_{\text{RAC}} \\ &= K_{\text{D,DA}} \frac{\theta_{\text{DA}}^{(0)}}{(1 - \theta_{\text{DA}}^{(0)})} + B_{\text{max}} (\theta_{\text{DA}}^{(0)} - \theta_{\text{DA}}) + \delta\theta_{\text{RAC}}. \end{aligned} \quad [\text{S2}]$$

We can employ Eqs. S1 and S2 to relate  $\theta_{\text{DA}}$  and  $\theta_{\text{RAC}}$  under several scenarios:

i) If we assume the free pool is large in comparison to the bound pool and we ignore RAC-induced DA release, this is equivalent to ignoring the second and third terms in Eq. S2. Under these conditions, the change in DA occupancy ( $\Delta\theta_{\text{DA}} = \theta_{\text{DA}} - \theta_{\text{DA}}^{(0)}$ ) is proportional to RAC occupancy and DA occupancy, and we refer to this model as the linear approximation in the main text:

$$\Delta\theta_{\text{DA}} = -\theta_{\text{RAC}}\theta_{\text{DA}}^{(0)}. \quad [\text{S3}]$$

ii) If we ignore RAC-induced DA release but conserve free plus bound dopamine by including the second term in [S2], then the relationship in [S3] deviates only subtly from linearity

using literature parameters (Fig. S5). Reported values for  $B_{\text{max}}$  in striatum for humans and nonhuman primates (NHPs) are about 20 nM (2, 3) and the  $K_{\text{D,DA}}$  for D2R has been estimated to be about 100 nM (4). Although this model produces a relationship between RAC and DA occupancies that is not strictly linear, there is no meaningful difference between this model and the linear approximation.

iii) To include the effect of DA release due to antagonism of autoreceptors, we must rely upon data from rats, where i.p. injection of a dose slightly larger than the maximal dose used in this study produced an approximate doubling of extracellular DA (5). Under these conditions, the relationship between RAC and DA occupancies is described by a quadratic equation that deviates from linearity at middle occupancies (Fig. S5). This model produces a superlinear relationship between DA and RAC occupancies.

Negative changes in DA occupancy are plotted on the y axis in Fig. S5 to provide plots comparable to those in Fig. 5. The three curves correspond to the three assumptions above. Fitting a power function ( $a(\theta_{\text{RAC}})^b$ ) to the superlinear relation that assumes additional DA release (Fig. S5, red curve), gives an exponent of  $b = 1.6$ . This value is very similar to experimental values we observed in Fig. 5. Thus, one interpretation of Fig. 5 is that a superlinear relationship between RAC occupancy and functional magnetic resonance imaging (fMRI) signal results from a superlinear relationship between RAC occupancy and changes in DA occupancy, together with a linear relationship between DA occupancy and the fMRI response.

## Occupancy and Dynamic Binding Potential

Binding potential relative to a nondisplaceable tissue compartment ( $BP_{\text{ND}}$ ) is defined in terms of the available concentration of receptors for binding ( $B_{\text{avail}}$ ) relative to the dissociation constant ( $K_{\text{D}}$ ), scaled by the fraction of ligand that is freely dissolved in tissue water (6). For this study,  $B_{\text{avail}}$  is equal to the total density of receptors ( $B_{\text{max}}$ ) reduced by the fraction occupied by DA ( $\theta_{\text{DA}} = B_{\text{DA}}/B_{\text{max}}$ ) and RAC ( $\theta_{\text{RAC}}$ ). Consequently, the absolute change  $\Delta BP_{\text{ND}}$ , relative to a tracer dose  $BP_{\text{ND}}^{(0)}$ , can be expressed in terms of occupancies:

$$\begin{aligned} \frac{\Delta BP_{\text{ND}}}{BP_{\text{ND}}^{(0)}} &= \frac{(1 - \theta_{\text{DA}}^{(0)}) - (1 - \theta_{\text{DA}} - \theta_{\text{RAC}})}{1 - \theta_{\text{DA}}^{(0)}} \\ &= \frac{\theta_{\text{RAC}} + \Delta\theta_{\text{DA}}}{1 - \theta_{\text{DA}}^{(0)}}. \end{aligned} \quad [\text{S4}]$$

In all notations,  $\theta$  denotes the theoretical occupancy of DA or RAC, whereas  $\hat{\theta}$  denotes the measured occupancy value derived from positron-emission tomography (PET) imaging data. The superscript (0) denotes basal DA conditions. The change in DA occupancy can be related to RAC occupancy from Eq. S3, so that the fractional change in  $BP_{\text{ND}}$  becomes an index of RAC occupancy:

$$\hat{\theta}_{\text{RAC}} \equiv \frac{\Delta BP_{\text{ND}}}{BP_{\text{ND}}^{(0)}} \approx \theta_{\text{RAC}}. \quad [\text{S5}]$$

All computations of  $BP_{\text{ND}}$  or the related “dynamic” binding potential ( $DBP_{\text{ND}}$ , Eq. 3) were performed within the framework

of the simplified reference tissue model (SRTM) (7). In differential form, the time derivative of a tissue time-activity curve (TAC) ( $\dot{C}_T$ ) can be written in terms of a reference region concentration ( $C_{REF}$ ), an index ( $R_1$ ) of the extraction-flow product relative to the reference region, a time constant for outflow from the reference region into plasma ( $k_2$ ), and the binding potential ( $BP_{ND}$ ) as

$$\begin{aligned}\dot{C}_T &= R_1 \dot{C}_{REF} + k_2 C_{REF} - k_{2a} C_T \\ &= R_1 \dot{C}_{REF} + R_1 k_2' C_{REF} - \frac{R_1 k_2'}{1 + BP_{ND}} C_T.\end{aligned}\quad [S6]$$

Although analytical solutions (7) or general linear model (GLM) techniques (8, 9) often solve for three local parameters, the reference region rate constant ( $k_2$ ) is a global parameter, and thus Eq. S4 contains an extra degree of freedom for each voxel or region of interest (ROI) (10). Two questions arise regarding the determination of an appropriate index of occupancy for comparison with a dynamic fMRI response like CBV(t):

- i) Should we employ a steady-state analysis based upon  $BP_{ND}$ , even though physiology clearly is changing?  $BP_{ND}$  represents a weighted average across the 90-min measurement interval, and the weighting function changes vs. the injected mass dose. A dynamic index of receptor availability might offer a less biased alternative. A dynamic binding potential ( $DBP_{ND}$ , Eq. 3) is a temporal analog of  $BP_{ND}$  that is determined in analysis by including a temporal dependence in parameter  $k_{2a}(t)$  (8).
- ii) Should we fix parameter  $k_2'$  or employ the original three-parameter SRTM? From inspection, it is clear that  $k_2'$  will be biased toward zero to reduce noise from the last two terms when BP is small, and this bias should affect other parameters as well. Because specific binding varies with mass dose, a three-parameter model may exhibit more bias vs. mass.

On the basis of this reasoning, we employed a standard steady-state  $BP_{ND}$  analysis with a two-parameter SRTM and a dynamic analysis by adding a time-dependent  $k_{2a}(t)$  term. A comparison of the two model fits is shown in Fig. S2 for the 16  $\mu\text{g}/\text{kg}$  dataset in animal M2. The dynamic analysis provides a better fit visually and is based on  $\chi^2/DOF$  values, which are  $2.8 \times 10^6$  and  $0.7 \times 10^6$  for the SRTM and dynamic analysis, respectively.

### Forward-Model Simulation and Analysis

This section describes simulations that (i) investigated the accuracy of SRTM estimates of occupancy using the coinfusion paradigm employed in this study and (ii) compared simplified estimates of specific binding based upon SRTM with actual specific binding in a simulation model with separate free and specifically bound compartments.

Because our experimental paradigm used progressively larger doses of RAC to reduce  $BP_{ND}$ , we investigated the accuracy of linear SRTM measurements of occupancy as a function of RAC dosage, using forward-model simulations, which included compartments for plasma, free, and specifically bound RAC and free and specifically bound DA (3). Literature values were employed for all rate constants, dissociation constants, and the concentration of D2R (Table S1). Plasma kinetics were approximated by a gamma-variate profile for RAC injection followed by biexponential decay of RAC from plasma; these kinetics were adjusted to match the reference region TAC from experimental data. Synthetic noise (11) was applied to TACs to approximate experimental data from basal ganglia ROIs. Because simulations separated free and specifically bound compartments, true values for specific binding were known as a function of time. Hence, we could assess the accuracy of SRTM analyses based upon  $BP_{ND}$  values vs. that based on time-dependent binding models.

We analyzed simulated data by the GLM, using the same software that was employed to analyze real data. Analyses used the integral form of [S6] and either three local constant parameters (8), as in [S6], or two local parameters (12). Additionally, we evaluated the effect of a time-dependent  $k_{2a}$  (following ref. 8). The time dependence was implemented as a gamma-variate function specified by a single parameter defining the time to peak ( $\tau$ ). Thus, SRTM included either three or four local parameters, and the reduced model [multilinear reference tissue model (MRTM2)] included a global value for  $k_2$  ( $k_{2,G}$ ) and either two or three local parameters, with the latter version explicitly formulated as

$$\begin{aligned}C_T(t) &= R_1 \left( C_{REF} + k_{2,G}' \int C_{REF}(t) dt \right) \\ &\quad - k_{2a} \int C_T(t) dt - k_{2a\gamma} \int \gamma(t, \tau) C_T(t) dt,\end{aligned}\quad [S7]$$

where

$$\gamma(t, \tau) = (t/\tau) e^{(1-t/\tau)}.$$

When employing a time-dependent  $k_{2a}$  term, the time-to-peak parameter was determined in two different ways to determine the sensitivity of results to the choice of the time constant  $\tau$ : (i) by minimizing the  $\chi^2/DOF$  of the GLM fit to data for each dose or (ii) by minimizing the  $\chi^2/DOF$  for the lowest dose and maintaining that value of  $\tau$  for all doses.

The main simulation results are summarized in Fig. S3. The conventional SRTM model produced estimates of RAC occupancies that underestimated true peak occupancies by 10–15% at high doses (black squares). Best results were obtained by adding a gamma time dependence to MRTM2 (red circles) in which the variable  $\tau$  was optimized for each dose. Errors in occupancy were <2% at all doses. Intermediate results with up to 7% error were obtained by using fixed values of  $\tau$ , based upon fits within MRTM2 for data at the lowest mass dose. Fitting up to four parameters (SRTM with a gamma time dependence on  $k_{2a}$ ) did not provide stable estimates of  $\tau$  across doses within simulations.

These results suggest that the most accurate method for determining peak changes in RAC occupancies in this coinfusion paradigm is to (i) fit parameter  $k_2'$  in a high-binding region (e.g., putamen) at low mass dose, (ii) eliminate the extra degree of freedom incorporated into the three-parameter SRTM model by fixing  $k_2'$ , and (iii) add a time-dependent binding term that is optimized at each dose by minimizing the  $\chi^2/DOF$  in a high-binding region (e.g., putamen).

In a full reference tissue model (FRTM) (13), specific binding is known, whereas SRTM analysis determines only the ratio of the rate constants ( $k_3, k_4$ ) between the free and specifically bound compartments, as well as an effective rate constant ( $k_{2a}$ ) for washout. In measurements and fits, the offset rate constant ( $k_4$ ) has been determined to be about 3–10 times smaller than the washout rate constant (3, 14), so that the free and nonspecifically bound compartment changes much more rapidly in time than the specifically bound compartment. Thus, an approximate index of specific binding can be obtained through SRTM by correcting the tissue concentration TAC for ligand delivery and washout by subtracting the reference region and scaling for the relative flow-extraction product ( $R_1$ ) as  $C_S \approx \hat{S} = C_T - R_1 C_{REF}$ . Fig. S4 compares specific binding  $C_S$  as determined from an analysis with the FRTM to the specific binding estimate  $\hat{S}$ . In both cases, the peak of  $\hat{S}$  is shifted by no more than a few minutes compared to that of  $C_S$ , which is comparable to the uncertainty in the time-to-peak response of fMRI signal and PET-specific binding in this study based upon optimization of the  $\chi^2/DOF$ , as described in *Results*.
